# Supplementary material for: Gold nanoparticle-decorated MoS2 nanosheets for simultaneous detection of ascorbic acid, dopamine and uric acid
Source: Royal Society of Chemistry journal article supplement (doi:10.1039/c4ra04046e), 2014-01-01
Supplement: c4ra04046e1.pdf [file c4ra04046e1.pdf]

## Gold nanoparticle-decorated on MoS<sub>2</sub> nanosheets for simultaneous detection of ascorbic acid, dopamine and uric acid

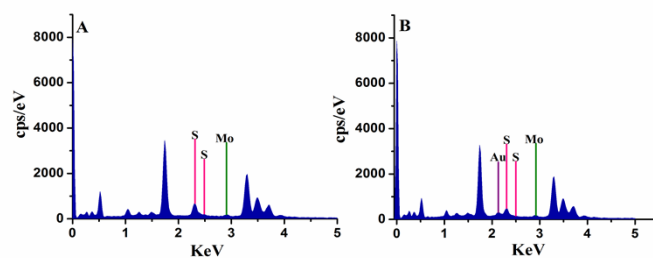

**Figure S1.** EDX of synthesized (A) MoS<sub>2</sub> and (B) AuNPs-decorated MoS<sub>2</sub>.

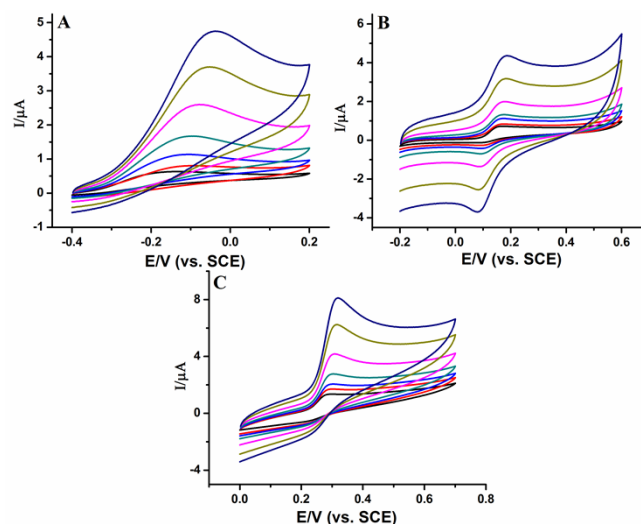

**Figure S2.** (A-C) Cyclic voltammograms of AA, DA and UA at AuNPs@MoS<sub>2</sub>/GCE in pH 7.0 PB solution at scan rates of 10, 20, 30, 50, 100, 200, 300 mV/s, respectively.

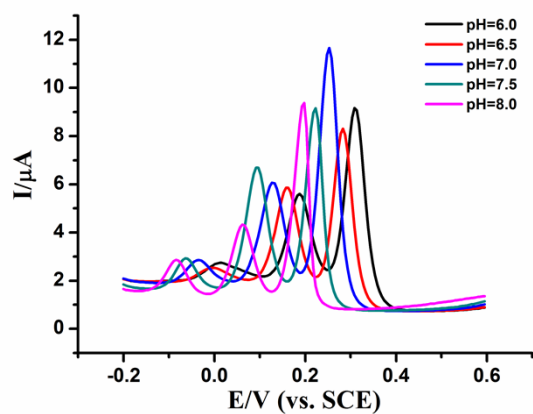

**Figure S3.** DPV profiles at AuNPs@MoS<sub>2</sub>/GCE in pH value containing 30 mM AA, 10 μM DA and 60 mM UA in 0.1 M PB solution.

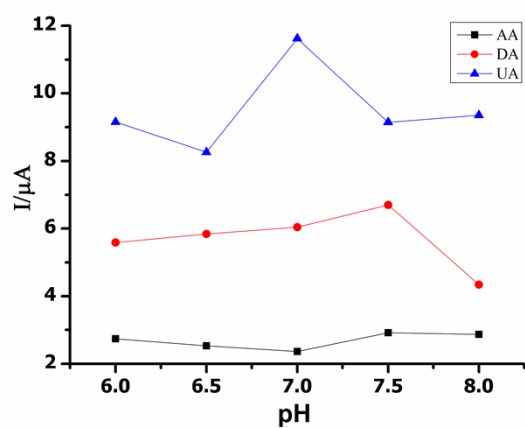

**Figure S4.** Effect of pH by DPV on the peak current of AA, DA and UA.
